# Supplementary material for: Is erenumab an efficient alternative for the prevention of episodic and chronic migraine in Spain? Results of a cost-effectiveness analysis
Source: Springer Nature journal article supplement (doi:10.1186/s10194-024-01747-w), 2024-03-15
Supplement: MOESM1 [file 26865088]

## SUPPLEMENTARY MATERIAL

### S1. Tornado diagram. Episodic Migraine

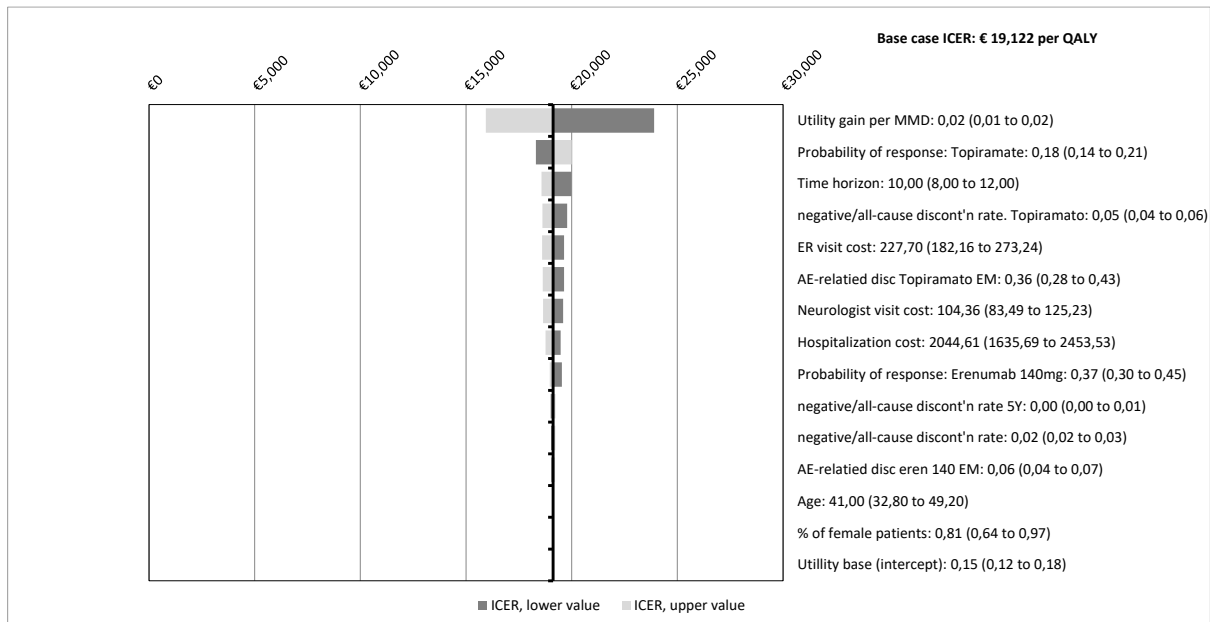

S2. Cost-effectiveness result at 10 years. Societal perspective

| COMPARATORS              | Cost    | Effectiveness |        | ICER                             |
|--------------------------|---------|---------------|--------|----------------------------------|
|                          |         | MD            | QALYs  |                                  |
| <b>Episodic Migraine</b> |         |               |        |                                  |
| Topiramate + BSC         | €53,157 | 1,049         | 5.8839 | -                                |
| Erenumab + BSC           | €52,393 | 877           | 6.1150 | Erenumab is dominant alternative |
| <b>Chronic Migraine</b>  |         |               |        |                                  |
| Placebo + BSC            | €92,023 | 2,100         | 4.5016 | -                                |
| Erenumab + BSC           | €76,875 | 1,532         | 5.2578 | Erenumab is dominant alternative |

BSC: Best Supportive Care; ICER: Incremental Cost-effectiveness Ratio; MD: migraine days; QALYs: quality-adjusted life year

A dominant treatment option is one that is both less costly and results in better health outcomes than the comparator treatment.

### S3. Tornado diagram. Chronic Migraine

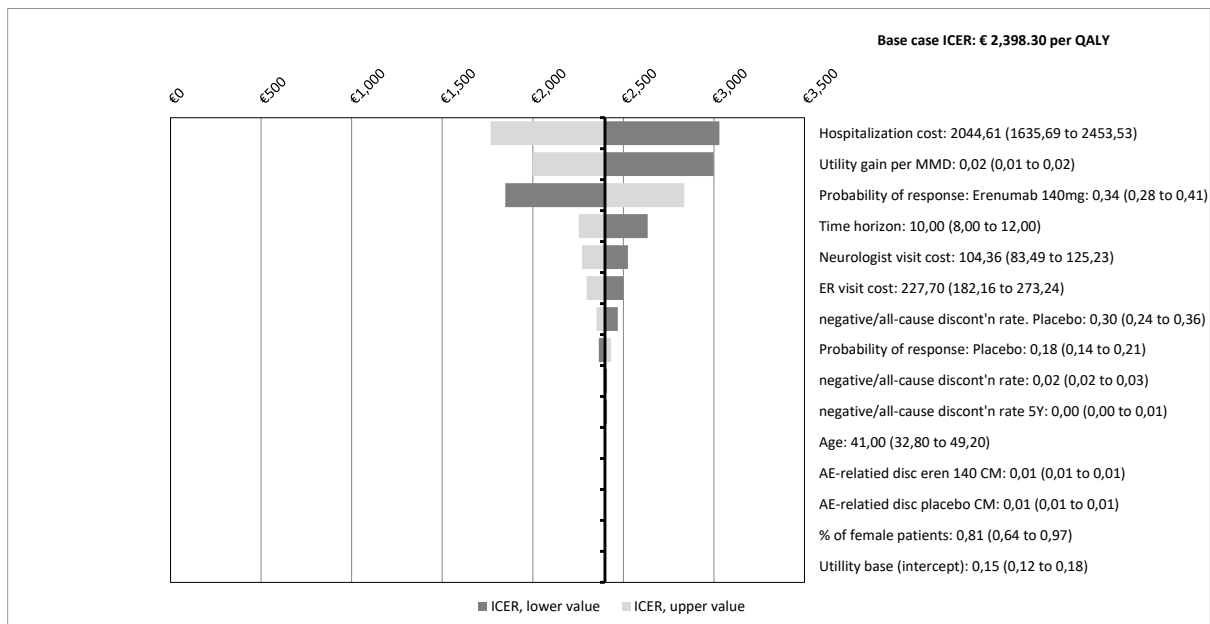

S4. Cost-effectiveness result. Scenario analysis

| BASE CASE                          | ICER (€/MDD)      |                  | ICER (€/QALY)     |                  |
|------------------------------------|-------------------|------------------|-------------------|------------------|
|                                    | Episodic Migraine | Chronic Migraine | Episodic Migraine | Chronic Migraine |
| BASE CASE                          | €26/MD            | €3/MD            | €19,122/QALY      | €2,398/QALY      |
| NUMBER OF PRIOR TREATMENT FAILURES |                   |                  |                   |                  |
| 1                                  | €26/MD            | €4/MD            | €19,122/QALY      | €3,291/QALY      |
| 2                                  | €24/MD            | €3/MD            | €18,213/QALY      | €2,595/QALY      |
| 3                                  | €22/MD            | €3/MD            | €16,361/QALY      | €2,398/QALY      |
| FREQUENCY EPISODES                 |                   |                  |                   |                  |
| Lower frequency episode            | €47/MD            | -                | €34,432/QALY      | -                |
| All patients                       | €27/MD            | -                | €20,453/QALY      | -                |
| FAILURE TO ONABOTULINUMTOXINA      |                   |                  |                   |                  |
| Absence                            | -                 | €6/MD            | -                 | €4,749/QALY      |
| MEDICATION OVERUSE                 |                   |                  |                   |                  |
| No                                 | -                 | €6/MD            | -                 | €4,365/QALY      |
| DISCOUNT RATE FOR COST AND EFFECTS |                   |                  |                   |                  |
| 0%                                 | €25/MD            | €3/MD            | €18,77/QALY       | €2,279/QALY      |
| 1%                                 | €25/MD            | €3/MD            | €18,891/QALY      | €2,318/QALY      |
| 5%                                 | €26/MD            | €3/MD            | €19,356/QALY      | €2,480/QALY      |
| TIME HORIZON                       |                   |                  |                   |                  |
| 3 years                            | €33/MD            | €6/MD            | €25,588/QALY      | €4,746/QALY      |
| 5 years                            | €30/MD            | €4/MD            | €22,218/QALY      | €3,321/QALY      |
| 15 years                           | €24/MD            | €3/MD            | €17,965/QALY      | €2,086/QALY      |
| 30 years                           | €22/MD            | €2/MD            | €16,868/QALY      | €1,677/QALY      |
| AGE OF PATIENTS                    |                   |                  |                   |                  |
| 20 years old                       | €26/MD            | €3/MD            | €19,110/QALY      | €2,394/QALY      |
| 60 years old                       | €25/MD            | €3/MD            | €19,207/QALY      | €2,427/QALY      |
| 80 years old                       | €21/MD            | €3/MD            | €20,096/QALY      | €2,721/QALY      |
| PERCENTAGE OF FEMALE PATIENTS      |                   |                  |                   |                  |
| 0%                                 | €26/MD            | €3/MD            | €19,130/QALY      | €2,401/QALY      |
| 100%                               | €26/MD            | €3/MD            | €19,120/QALY      | €2,398/QALY      |
| REIMBURSED PRICE                   |                   |                  |                   |                  |
| No                                 | €78/MD            | €18/MD           | €57,718/QALY      | €13,799/QALY     |

ICER: Incremental Cost-effectiveness Ratio; MD: migraine days; QALYs: quality-adjusted life year
